# Supplementary material
Source: PubMed Central journal article supplement (PMC5801545)

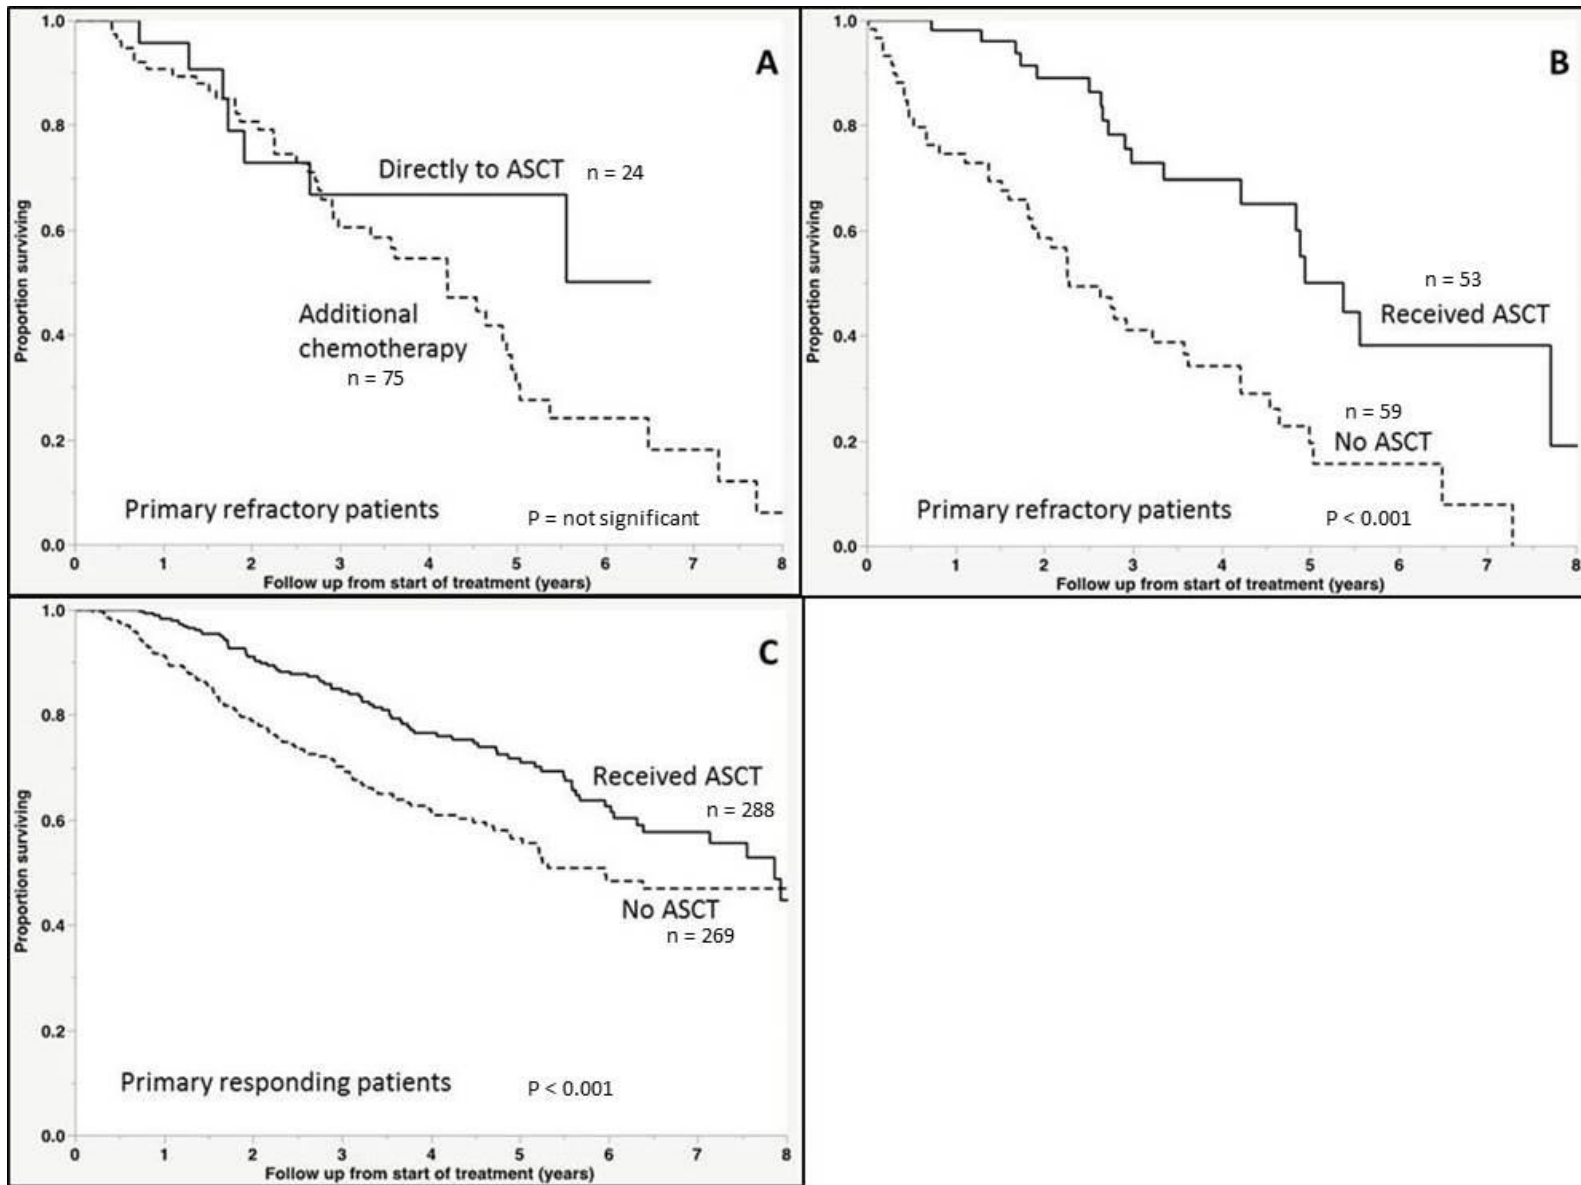

Supplement: NIHMS935185-supplement-supplement_1.pdf [file NIHMS935185-supplement-supplement_1.pdf]
